# Supplementary material for: Introgression between ecologically distinct species following increased salinity in the Colorado Delta- Worldwide implications for impacted estuary diversity
Source: PeerJ journal article supplement (doi:10.7717/peerj.4056), 2017-12-12
Supplement: FigS1.tif.pdf [file FigS1.tif.pdf]

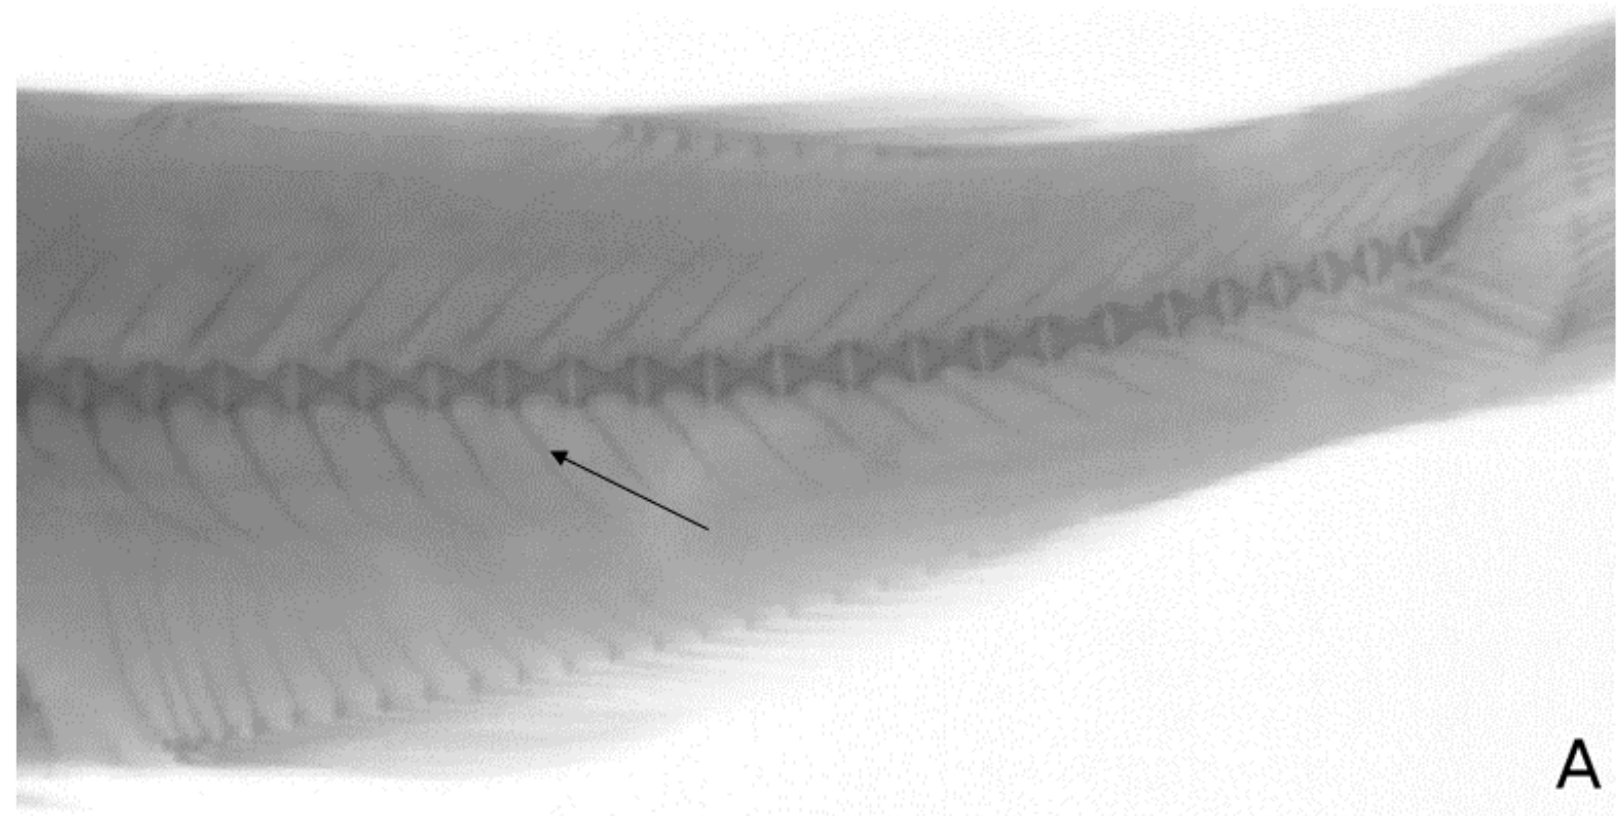

A

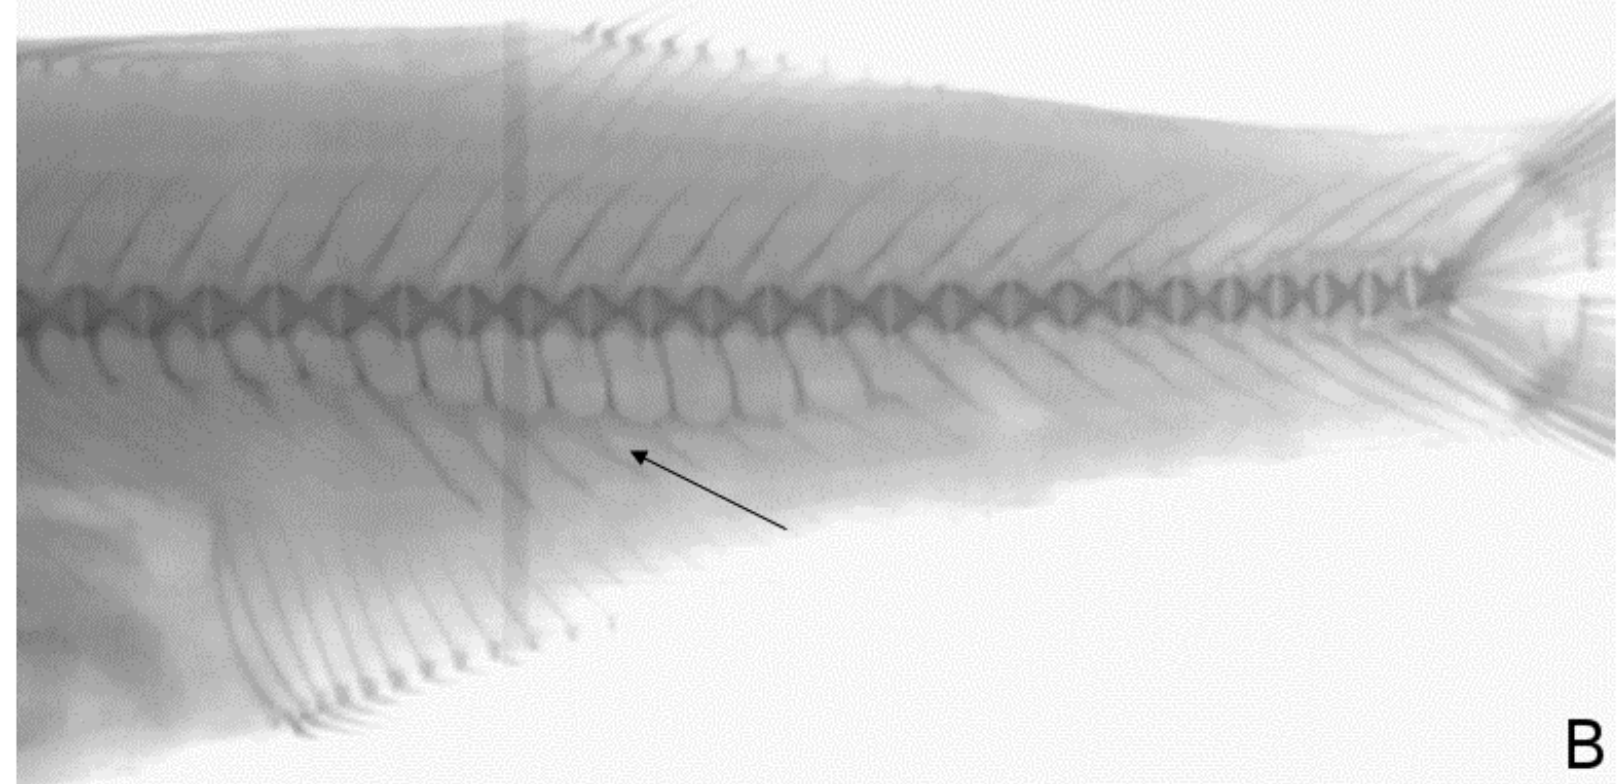

B
