# Supplementary material for: Introgression between ecologically distinct species following increased salinity in the Colorado Delta- Worldwide implications for impacted estuary diversity
Source: PubMed Central journal article supplement (PMC5731342; doi:10.7717/peerj.4056), 2017-12-12

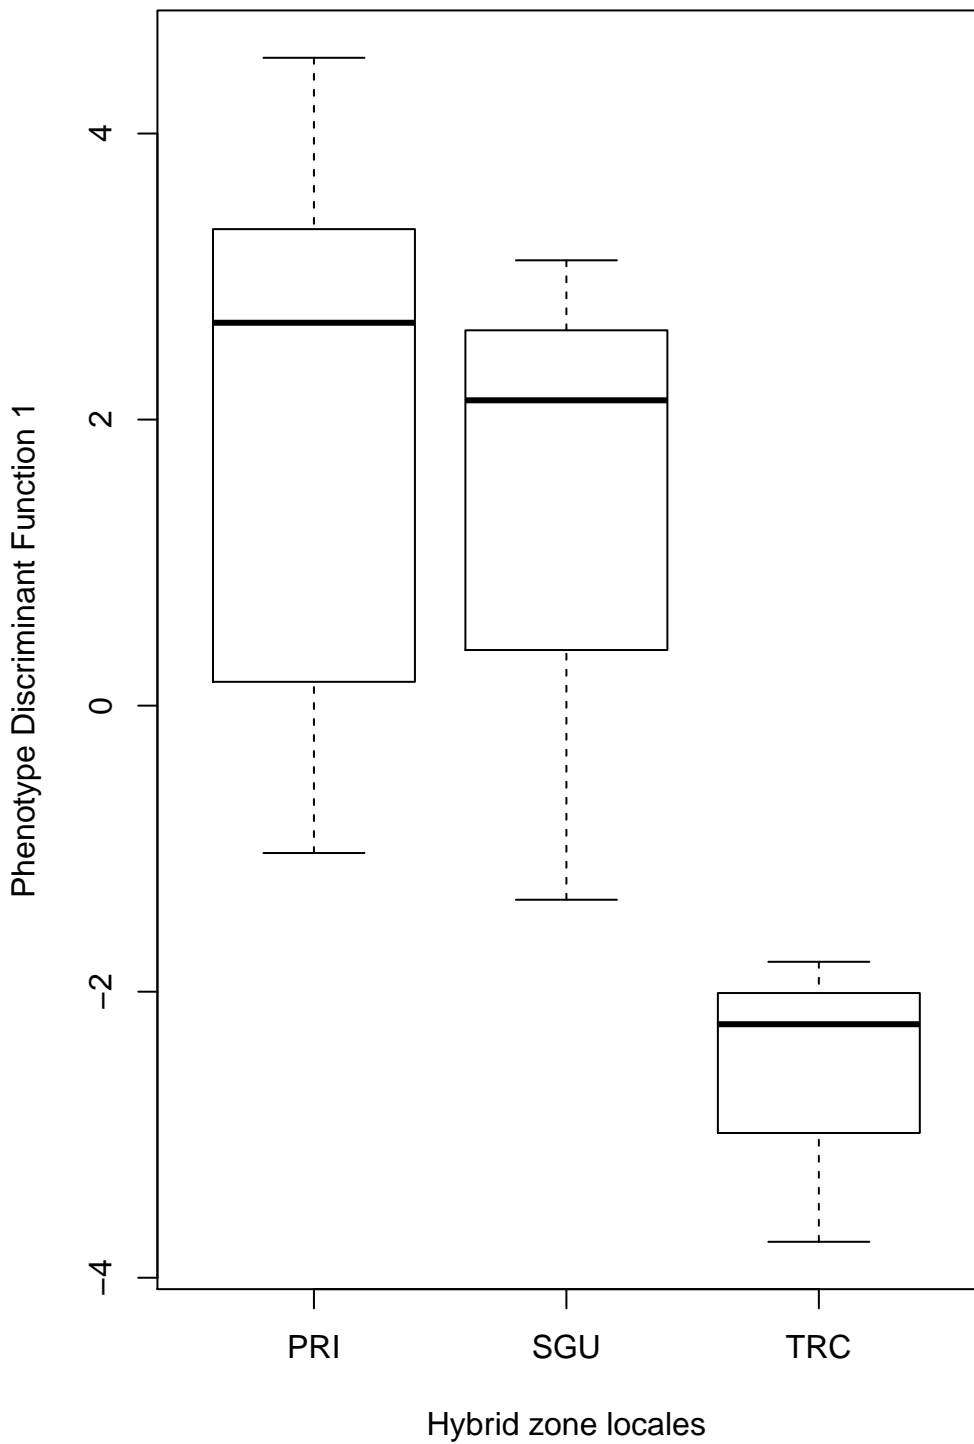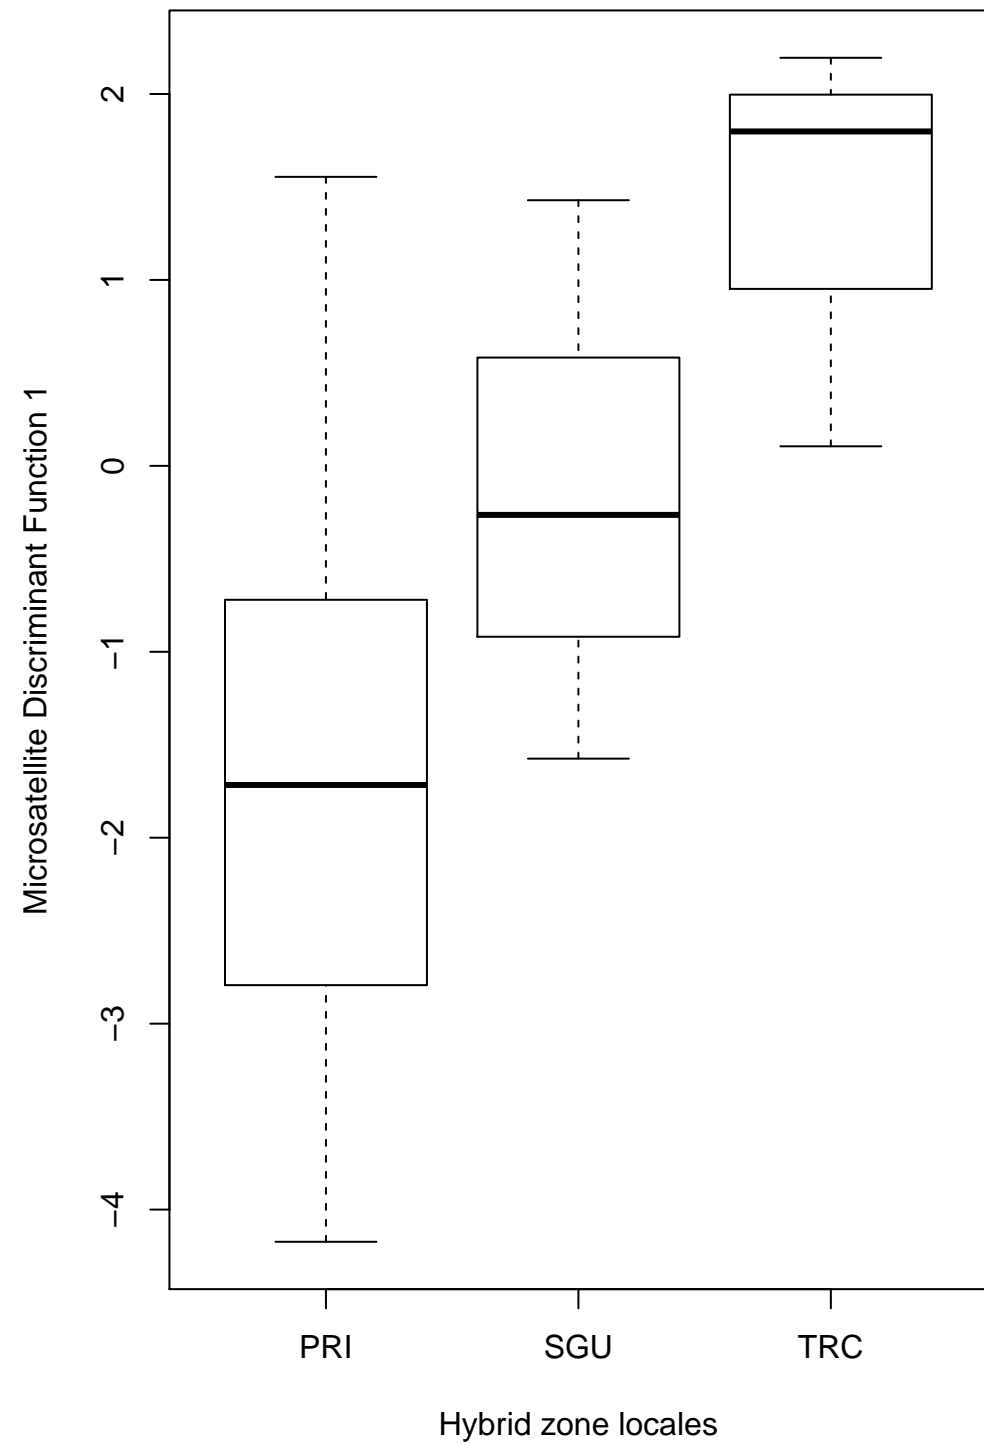

Supplement: peerj-05-4056-s003.pdf [file peerj-05-4056-s003.pdf]
